# Supplementary material for: An Assessment of Human versus Climatic Impacts on Jing River Basin, Loess Plateau, China
Source: Hindawi journal article supplement (doi:10.1155/2015/478739), 2015-01-01
Supplement: f1 [file 478739.f1.docx]

**Supplementary Material for manuscript “An assessment of human versus climatic impacts on Jing River Basin, Loess Plateau China”**

Note: Figure S1 is used to demonstrate the selection for spatial interpolation method, the detailed description is in section 2.3.3. Table S1 and Table S2 are used to illustrate the results of different landscape indices in different land cover types.

**Spatial interpolation method**

Spatial interpolation methods are developed for specific data types or a specific variable. They have been applied to various disciplines, such as mining engineering [1] and environmental sciences [2].

In this study, to ensure high spatial interpolation precision for the spatially averaged data,12 of the most popular spatial interpolation methods were compared; the Inverse Distance Weighted (IDW), Global Polynomial Interpolation (GPI), Local Polynomial Interpolation (LPI), Radial Basis Functions (RBF), Ordinary Kriging (OK), Simple Kriging (SK), Universal Kriging (UK), Disjunctive Kriging (DK), Ordinary Co-Kriging (OCK), Simple Co-Kriging (SCK), Universal Co-Kriging (UCK), and Disjunctive Co-Kriging (DCK). The statistics of the differences (absolute and squared) between the measured and predicted values at sampled points are often used as an indicator of the performance of an inexact method [2].Commonly used error measures include the mean squared error (MSE) and root mean squared error (RMSE)[3]. The definitions of MSE and RMSE are as follows:

(1)

(2)

where N is the number of observations or samples; Oi is the observed value; and Pi is the predicted or estimated value.

We selected precipitation and potential evapotranspiration in July 1960, 1975 and 1985 as a random test period to compare the methods. The results (Fig. S1) show that the SK method is preferred, because SK had the lowest RMSE. We therefore selected the SK spatial interpolation method to calculate the spatially averaged precipitation and the potential evapotranspiration for the Jing River Basin.

**FIGURE S1** Precipitation and evapotranspiration (ET0) root mean squared error (RMSE) for twelve different interpolation methods

**Landscape metrics change**

Land cover characteristics have long been recognized as major factor for soil erosion. In our study, we applied Fragstats model system to calculate the metrics, which is a widely accepted tool for landscape metrics quantification [4]. The results showed that most of the spatial pattern of land use experienced little changes during the whole study period, apart from LSI of both arable land and barren land, and PARA of wetland and water body increased (Table S1–2).

Table S1 Comparison of landscape indices at class level in 1980 and 2005.

| year | Category | Forest | Grassland | Arable land | Built-up land | Wetland and water body | Barren land |
| --- | --- | --- | --- | --- | --- | --- | --- |
| 1980 | PD | 0.042 | 0.050 | 0.010 | 0.007 | 0.000 | 0.038 |
| ED | 14.562 | 14.283 | 0.321 | 0.264 | 0.003 | 2.673 |
| LSI | 111.591 | 112.909 | 22.419 | 20.764 | 2.000 | 49.692 |
|  | PARA | 64.725 | 66.369 | 68.039 | 71.231 | 55.556 | 64.920 |
|  | FI | 0.001 | 0.001 | 0.018 | 0.015 | 0.013 | 0.005 |
| 2005 | PD | 0.040 | 0.052 | 0.012 | 0.007 | 0.000 | 0.043 |
| ED | 14.541 | 14.195 | 0.431 | 0.260 | 0.004 | 2.969 |
| LSI | 111.205 | 113.244 | 32.589 | 20.778 | 2.000 | 57.298 |
|  | PARA | 64.914 | 66.195 | 67.742 | 71.644 | 63.750 | 64.401 |
|  | FI | 0.001 | 0.001 | 0.016 | 0.016 | 0.012 | 0.005 |

Table S2 Comparison of landscape indices at landscape level in 1980 and 2005.

| Category | 1980 | 2005 |
| --- | --- | --- |
| FRAC | 1.031 | 1.031 |
| PAFRAC | 1.644 | 1.637 |
| CONTAG | 49.082 | 48.078 |
| FI | 0.001 | 0.002 |
| SHDI | 0.975 | 0.993 |
| MSIDI | 0.000 | 0.000 |
| SHEI | 0.544 | 0.554 |
| MSIEI | 0.000 | 0.000 |

**References:**

[1] A. G. Journel and C. J. Huijbregts, Mining Geostatistics, Academic Press, London, pp. 600, 1978.

[2] P. A. Burrough and R. A. McDonnell, Principles of Geographical Information Systems, Oxford University Press, Oxford, pp. 333, 1998.

[3] J. Li, A. D. Heap, “A review of comparative studies of spatial interpolation methods in environmental sciences: Performance and impact factors”, Ecological Informatics, vol. 6, no. 3–4, pp. 228–241, 2011.

[4]R. N. Coulson, M. A. Pinto, M. D. Tchakerian, K. A. Baum, W. L. Rubink, and J. S. Johnston. “Feral honey bees in pine forest landscapes of east Texas”, Forest Ecology and Management, vol. 215, no. 1–3, pp. 91–102, 2005.
